# Supplementary material for: Meta-analysis of high-latitude nitrogen-addition and warming studies implies ecological mechanisms overlooked by land models
Source: Copernicus journal article supplement (doi:10.5194/bg-11-6969-2014), 2014-12-11
Supplement: Supplementary file 1 [file Table S1.xlsx]

## Sheet: Sheet1
Region	Site name	Longitude & Latitude	Treatment	Magnitude of N added (kg-N ha-1 yr-1)	[N] added to the soil (mg-N g-1 dry mass of organic soil)	N-speciation added	Notes on frequency of nitrogen addition	Change in soil temperature (°C)*	Warming method	Reference
Europe
Sweden	Abisko	68°21'N 18°49'E	Warming					~ 1	OTC	Dorrepaal et al., 2009
			Warming					1	OTG	Rinnan et al., 2007b
			Warming					2	OTG	Rinnan et al., 2008
			Warming					1	OTG	Jonasson et al., 1993
			Warming					1	OTG	Jonasson et al., 1993
			Warming					1.7	OTC	Aerts et al., 2012
			Warming					NG	OTC	Weedon et al., 2011
			Warming					0.5 - 2.2	Snow manupulation	Weedon et al., 2011
			Warming					NG	OTC	Sjögersten et al., 2003
			Warming					NG	OTC	Kaarlejärvi et al., 2012
			Nitrogen & Warming	50 (first year); 100 (subsequent years)		NH4NO3	1 addition/ GS	1.2 - 2	OTG	Rinnan et al., 2007a
			Nitrogen & Warming	49		NPK		1.2 - 2	OTG	Sorensen et al., 2008
			Nitrogen & Warming	49 (first year); 100 (next 2 years)		NPK	1 addition/ GS	0.5	OTG	Jonasson et al., 1999
			Nitrogen & Warming	50 (first year); 100 (subsequent years)		NPK	1 addition/ GS	0.7	OTG	Havström et al., 1993
			Nitrogen & Warming	49 (first year); 100 (subsequent years)		NPK	1 addition/ GS	0.9 - 2	OTC	Ruess et al., 1999
			Nitrogen & Warming	100		NH4NO3	1 addition/ GS	0.5	OTG	Clemmensen et al., 2006
			Nitrogen	50		NH4NO3	1 addition/ GS			Illeris & Jonasson, 1999
			Nitrogen	100		NPK	1 addition/ GS			Christensen et al., 1997
			Nitrogen		8.75	NH4NO3				Hartley et al., 2010
			Nitrogen	50		NPK	2 additions/ GS			Haugwitz et al., 2011
			Nitrogen	100		NPK	1 addition/ GS			Michelsen et al., 1996
			Nitrogen	100		NH4NO3	3 additions/ GS = 100 kg ha-1 yr-1			Press et al., 1998
			Nitrogen	100		NH4NO3	6 addition/ GS			Richardson et al., 2002
			Nitrogen	50 (first year); 100 (subsequent years)		NH4NO3	1 addition/ GS			Rinnan et al., 2013
			Nitrogen	100		NH4NO3	4 additions/ GS = 100 kg ha-1 yr-1			Wookey et al., 1993
	Latnjajaure	68°21'N 18°30'E	Warming					1.5	OTC	Bjork et al., 2007
			Nitrogen	50		NH4NO3				jägerbrand et al., 2009
Norway	Joatka	69°75'N 23°99'E	Warming					NG	OTC	Kaarlejärvi et al., 2012
Finland	Kilpisjärvi	69°30'N 20°50'E	Warming					0.5 (0.2)	OTC	Rinnan et al., 2009
			Nitrogen	96		NPK	2 additions/ GS =96 kg ha-1 yr-1			Stark et al., 2011
	Salmisuo	62°47'N 30°56'E	Nitrogen	30		NH4NO3	6 addition/ GS			Berendse et al., 2001
			Nitrogen	30		NH4NO3	6 addition/ GS			Hoosbeek et al., 2002
	Sahalahti		Nitrogen	16 - 36		NH4NO3	80 - 180 kg ha-1 yr-1 added over 5 years			Smolander et al., 2005
	Heinola		Nitrogen	18		NH4NO3	633 kg ha-1 yr-1 added over 35 years			Smolander et al., 2005
Svalbard	Spitsbergen	78°10'N 16°06'E	Warming					~ 1	OTC	Strebel et al., 2010
			Warming					~ 1.6	OTC	Sjögersten et al., 2012
			Nitrogen & Warming	50		NH4NO3	4 additions/ GS = 50 kg ha-1 yr-1	0.7	OTC	Robinson et al., 1998
			Nitrogen & Warming	50		NH4NO3	4 additions/ GS = 50 kg ha-1 yr-1	0.7	OTC	Robinson et al., 1995
	Kongsfjorden	78°56'N 11°51'E	Nitrogen	1		NH4NO3	1 addition/ GS			Stapleton et al., 2005
			Nitrogen	5		NH4NO3	1 addition/ GS			Stapleton et al., 2005
			Nitrogen	50		NH4NO3	4 additions/ GS = 50 kg ha-1 yr-1			Wookey et al., 1994
			Nitrogen	50		NH4NO3	4 additions/ GS = 50 kg ha-1 yr-1			Wookey et al., 1995
			Nitrogen	100		NH4NO3	2 additions/ GS = 100 kg ha-1 yr-1			Wookey et al., 1993
Greenland	Söndrestrm Fjord	67°11'N 50°37'W	Warming					NG	OTC	Cahoon et al., 2011
	Zackenberg		Nitrogen	37.5		NH4NO3				Christiansen et al., 2012a
				37.5		NH4NO3	Addition 3/ 14 exp. years			Christiansen et al., 2012b
			Nitrogen	37.5		NH4NO3	1 addition/ GS; 2/4 exp. Years			Illeris et al., 2003
Iceland	Various	64°13'N 21°93'W	Warming					2	Incubation	Guicharnaud et al., 2010
Siberia	Tazovskiy Peninsula	67°56'N 74°51'E	Warming					4	OTC	Biasi et al., 2008
North America
USA
Alaska	Barrow	71°18'N 156°40'W	Warming					2.5	OTC	Oberbauer et al., 2007
	Atqasuk	70°27'N 157°24'W	Warming					0.5 - 1	OTC	Oberbauer et al., 2007
	Toolik Lake	68°38'N 149°34'W	Warming					2	OTC	Oberbauer et al., 2007
			Warming					2	OTC	Jones et al., 1998
			Warming					5	Incubation	Lavoie et al., 2011
			Warming					2 - 4	OTG	Grogan and Chapin, 2000
			Warming					0.5	OTG	Sistla et al., 2012a
			Warming					NG	OTC & Snow fences	Wahren et al., 2005
			Warming					3	Incubation	Nadelhoffer et al., 1991
			Nitrogen & Warming	100		NH4NO3		0.2 - 4	OTG	Boelman et al., 2003
			Nitrogen & Warming	100		NH4NO3		0.2 - 4	OTG	Boelman et al., 2005
			Nitrogen & Warming	100		NH4NO3	1 addition/ GS	0.5	OTG	Clemmensen et al., 2006
			Nitrogen & Warming	100		NH4NO3	1 addition/ GS	1	OTG	Deslippe et al., 2011
			Nitrogen & Warming	100		NH4NO3	1 addition/ GS	1 - 2	OTG	Johnson et al., 2000
			Nitrogen & Warming	100		NH4NO3	1 addition/ GS	NG	OTG	Shaver et al., 1998
			Nitrogen	100		NH4NO3	1 addition/ GS			Gough et al., 2002
			Nitrogen	100		NH4NO3	1 addition/ GS			Nowinski et al., 2008
			Nitrogen		0.5	(NH4)2SO4				Sistla et al., 2012b
	Prudhoe Bay	70°27'N 148°33'W	Warming					0.5	OTC	Oechel et al., 1998
	Eight Mile Lake	63°52'N 149°15'W	Ecosystem Comparison					NA	NA	Trucco et al., 2012
			Snow Fences					NA	NA	Natali et al., 2011
	Delta Junction	63°55'N 145°44'W	Warming					0.5	OTG	Allison and Treseder, 2008
			Warming					0.5	OTG	Allison et al., 2010a
			Nitrogen & Warming	Order of magnitude increase		NH4NO3		5	Incubation	Lavoie et al., 2011
			Nitrogen	100		NH4NO3	1 addition/ GS			Allison et al., 2010b
	Eagle Summit	65°26'N 145°30'W	Warming					5	Incubation	Marion and Miller, 1982
Canada	Alexandra Fjord	78°53'N 75°47'W	Warming					1 - 2	OTC	Hudson et al., 2011
			Warming					1	OTC	Oberbauer et al., 2007
			Warming					1 - 3	OTC	Welker et al., 2004
	Daring Lake	64°52'N 111°34'W	Nitrogen & Warming	1		NH4NO3		2.5	OTG	Zamin and Grogan, 2012
			Nitrogen	100		NH4NO3	1 addition/ GS			Buckeridge et al., 2009
			Nitrogen	200	1.6	NH4NO3	Total			Churchland et al., 2010
Multiple	Litter decompostion	> 60°N	Warming					1 - 4	OTC	Cornelissen et al., 2007
	Aboveground response	> 60°N	Warming					1 - 3	OTC	Walker et al., 2006
OTC = Open top chamber
OTG = Open top greenhouse
NA = Not-applicable
NG = not given
GS = Growing season
