# Supplementary material for: Meta-analysis of high-latitude nitrogen-addition and warming studies implies ecological mechanisms overlooked by land models
Source: Copernicus journal article supplement (doi:10.5194/bg-11-6969-2014), 2014-12-11
Supplement: Supplementary file 2 [file bg-11-6969-2014-supplement-cover-letter.pdf › bg-11-6969-2014-supplement-cover-letter.pdf]

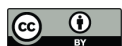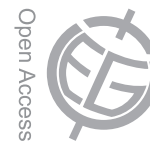

## *Supplement of*

# **Meta-analysis of high-latitude nitrogen-addition and warming studies implies ecological mechanisms overlooked by land models**

**N. J. Bouskill et al.**

*Correspondence to:* N. J. Bouskill (njbouskill@lbl.gov)

- bg-11-6969-2014-supplement-cover-letter.pdf
- Supplemental
  - Supplemental\_text.pdf
  - Table S1.xlsx
- \_\_MACOSX
  - Supplemental
    - \* .\_Supplemental\_text.pdf
    - \* .\_Table S1.xlsx
